# Supplementary material for: Cross-sectional and longitudinal associations between sleep duration, sleep quality, and bone stiffness in European children and adolescents
Source: PubMed Central journal article supplement — Osteoporos Int. 2020 Nov 27;32(5):853–63. doi: 10.1007/s00198-020-05753-x (PMC8043938; doi:10.1007/s00198-020-05753-x), 2020-11-27
Supplement: 198_2020_5753_MOESM1_ESM.pdf [file 198_2020_5753_MOESM1_ESM.pdf]

**Title:** Cross-sectional and longitudinal associations between sleep duration, sleep quality and bone stiffness in European children and adolescents

**Journal:** Osteoporosis International

**Authors:** Lan Cheng, MSc <sup>1,2</sup>, Hermann Pohlabein, PhD <sup>1</sup>, Wolfgang Ahrens, PhD <sup>1,2</sup>, Paola Russo, PhD <sup>3</sup>, Toomas Veidebaum, PhD <sup>4</sup>, Charalambos Hadjigeorgiou, PhD <sup>5</sup>, Dénes Molnár, PhD <sup>6</sup>, Monica Hunsberger, PhD <sup>7</sup>, Stefaan De Henauw, PhD <sup>8</sup>, Luis A. Moreno, PhD <sup>9</sup>, Antje Hebestreit, PhD <sup>1</sup>, on behalf of the IDEFICS and I.Family consortia

1. Leibniz Institute for Prevention Research and Epidemiology – BIPS, Bremen, Germany

2. Faculty of Mathematics and Computer Science, University of Bremen, Bremen, Germany

3. Institute of Food Sciences, National Research Council, Avellino, Italy

4. Department of Chronic Diseases, National Institute for Health Development, Tallinn, Estonia

5. Research and Education Institute of Child Health, Strovolos, Cyprus

6. Department of Pediatrics, Medical School, University of Pécs, Pécs, Hungary

7. Section for Epidemiology and Social Medicine (EPSO), The Sahlgrenska Academy, University of Gothenburg, Gothenburg, Sweden

8. Department of Public Health, Ghent University, 9000 Ghent, Belgium

9. GENUD (Growth, Exercise, Nutrition and Development) Research Group, Instituto Agroalimentario de Aragón (IA2), Instituto de Investigación Sanitaria Aragón (IIS Aragón), Centro de Investigación Biomédica en Red Fisiopatología de la Obesidad y Nutrición (CIBERObn), University of Zaragoza, 50009 Zaragoza, Spain

**Corresponding author:** Dr. Antje Hebestreit, Leibniz Institute for Prevention Research and Epidemiology – BIPS, Achterstraße 30, 28359 Bremen, Germany; Tel: +49 421

218-56849; E-mail: [hebestr@leibniz-bips.de](mailto:hebestr@leibniz-bips.de)

**Fig. S1** Sex-specific reference curves for bone stiffness index (SI) percentiles by age (years) for average children based on 50<sup>th</sup> height percentile in the IDEFICS/I.Family study

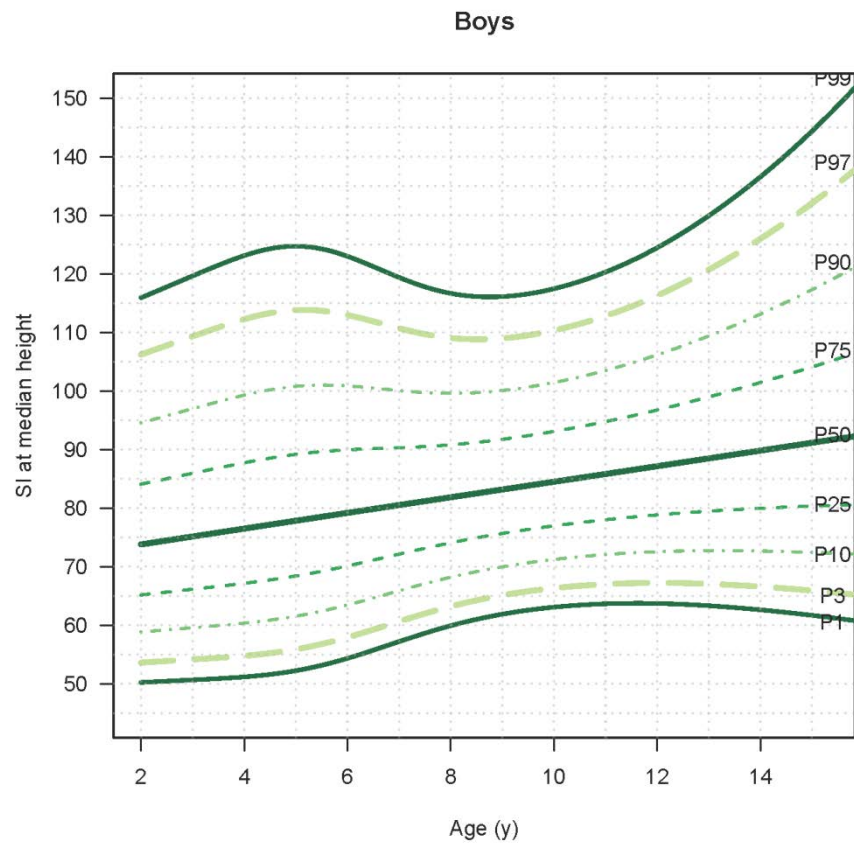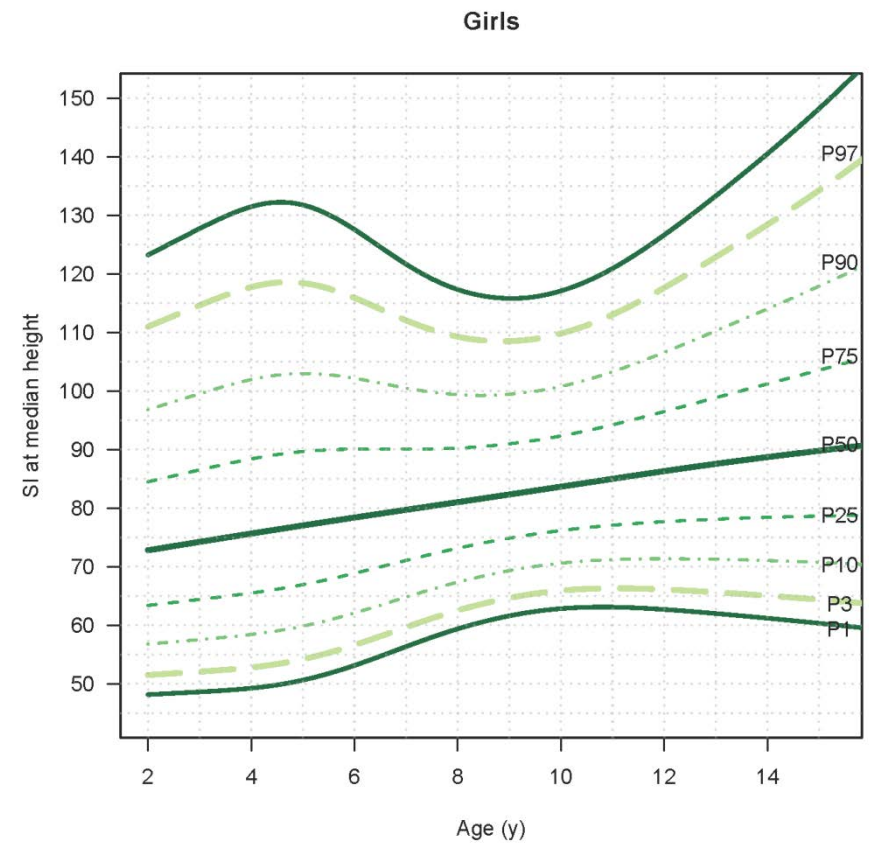

**Table S1** Results of Pearson's correlations (95% confidence intervals) between co-variables, sleep characteristics and bone stiffness index

|                                       | Daytime napping duration | Nocturnal sleep duration | Sleep quality score (0-3) | Bone stiffness index |
|---------------------------------------|--------------------------|--------------------------|---------------------------|----------------------|
| <i>Baseline</i>                       |                          |                          |                           |                      |
| Age                                   | -0.33(-0.35,-0.30)       | -0.33(-0.35,-0.30)       | -0.04(-0.06,-0.01)        | 0.13(0.10,0.16)      |
| Weight (kg)                           | -0.20(-0.22,-0.17)       | -0.31(-0.34,-0.29)       | -0.10(-0.13,-0.07)        | 0.14(0.11,0.17)      |
| Height (cm)                           | -0.28(-0.30,-0.25)       | -0.29(-0.32,-0.27)       | -0.01(-0.03,0.02)         | 0.15(0.13,0.18)      |
| Body mass index                       | -0.09(-0.12,-0.07)       | -0.24(-0.27,-0.22)       | -0.16(-0.19,-0.13)        | 0.06(0.03,0.09)      |
| Screen time (hours/week)              | -0.04(-0.07,-0.01)       | -0.26(-0.29,-0.23)       | -0.14(-0.16,-0.11)        | -0.02(-0.05,0.01)    |
| Sports club (hours/week)              | -0.14(-0.17,-0.11)       | -0.08(-0.10,-0.05)       | 0.06(0.03,0.09)           | 0.11(0.08,0.14)      |
| Daytime napping duration (10 min/day) | 1                        | -0.08(-0.10,-0.05)       | -0.004(-0.03,0.02)        | 0.05(0.02,0.08)      |
| Nocturnal sleep duration (hours/day)  | -0.08(-0.10,-0.05)       | 1                        | 0.17(0.15,0.20)           | 0.02(-0.004,0.05)    |
| Sleep quality score (0-3)             | -0.004(-0.03,0.02)       | 0.17(0.15,0.20)          | 1                         | 0.12(0.09,0.15)      |
| <i>Follow-up</i>                      |                          |                          |                           |                      |
| Age                                   | 0.14(0.07,0.21)          | -0.48(-0.53,-0.42)       | -0.33(-0.39,-0.27)        | 0.46(0.41,0.51)      |
| Weight (kg)                           | 0.09(0.02,0.15)          | -0.30(-0.37,-0.24)       | -0.19(-0.26,-0.13)        | 0.43(0.37,0.48)      |
| Height (cm)                           | 0.07(-0.001,0.13)        | -0.39(-0.45,-0.33)       | -0.25(-0.31,-0.19)        | 0.42(0.36,0.47)      |
| Body mass index                       | 0.08(0.01,0.14)          | -0.15(-0.22,-0.09)       | -0.16(-0.22,-0.09)        | 0.30(0.24,0.36)      |
| Screen time (hours/week)              | 0.04(-0.03,0.11)         | -0.22(-0.28,-0.16)       | -0.14(-0.21,-0.08)        | 0.11(0.05,0.18)      |
| Sports club (hours/week)              | -0.05(-0.11,0.02)        | -0.01(-0.08,0.06)        | 0.05(-0.02,0.11)          | 0.17(0.11,0.24)      |
| Daytime napping duration (10 min/day) | 1                        | -0.10(-0.17,-0.03)       | -0.07(-0.14,-0.01)        | 0.09(0.02,0.15)      |
| Nocturnal sleep duration (hours/day)  | -0.10(-0.17,-0.03)       | 1                        | 0.31(0.25,0.37)           | -0.25(-0.31,-0.19)   |
| Sleep quality score (0-3)             | -0.07(-0.14,-0.01)       | 0.31(0.25,0.37)          | 1                         | -0.15(-0.21,-0.08)   |

**Table S2** Cross-sectional associations between sleep characteristics and bone stiffness index percentiles in 2009/10

|                                   | Model 1           |         | Model 2           |         | Model 3            |         |
|-----------------------------------|-------------------|---------|-------------------|---------|--------------------|---------|
|                                   | $\beta$ (95%CI)   | p-value | $\beta$ (95%CI)   | p-value | $\beta$ (95%CI)    | p-value |
| Sex                               |                   |         |                   |         |                    |         |
| Boys vs. girls (reference)        | /                 | /       | -0.02(-1.49,1.44) | 0.97    | 0.04(-1.44,1.51)   | 0.96    |
| Age                               | /                 | /       | 0.09(-0.36,0.55)  | 0.69    | -0.12(-0.60,0.35)  | 0.61    |
| Family socioeconomic status       |                   |         |                   |         |                    |         |
| Low vs. high (reference)          | /                 | /       | -0.02(-2.97,2.93) | 0.99    | 1.56(-1.42,4.53)   | 0.30    |
| Medium vs. high (reference)       | /                 | /       | 0.56(-1.17,2.30)  | 0.52    | 1.09(-0.65,2.83)   | 0.22    |
| Daylight duration                 | /                 | /       | 0.49(0.17,0.81)   | 0.003   | 0.50(0.18,0.82)    | 0.003   |
| BMI z-scores                      | /                 | /       | 2.69(2.02,3.35)   | p<0.001 | 2.76(2.10,3.42)    | p<0.001 |
| Screen time                       | /                 | /       | /                 | /       | -0.14(-0.25,-0.04) | 0.009   |
| Sports club                       | /                 | /       | /                 | /       | 1.15(0.78,1.53)    | p<0.001 |
| Nocturnal sleep duration z-scores | 0.08(-0.80,0.96)  | 0.86    | 0.42(-0.46,1.30)  | 0.35    | 0.26(-0.63,1.14)   | 0.57    |
| Daytime napping                   | 0.62(0.28,0.95)   | p<0.001 | 0.74(0.38,1.10)   | p<0.001 | 0.78(0.43,1.14)    | p<0.001 |
| Sleep quality                     |                   |         |                   |         |                    |         |
| Poor vs. good (reference)         | -0.79(-2.46,0.88) | 0.35    | -0.69(-2.35,0.97) | 0.41    | -0.44(-2.09,1.22)  | 0.61    |

Footnote: Model 1: unadjusted model only with a random effect for country

Model 2: Model 1 + adjusted for sex, age, family socioeconomic status, BMI z-scores and daylight duration

Model 3: Model 2 + adjusted for screen time and time spent at sports club

**Table S3** Longitudinal associations between sleep characteristics and bone stiffness index percentiles in 2013/14

|                                             | Model 1           |         | Model 2            |         | Model 3            |         |
|---------------------------------------------|-------------------|---------|--------------------|---------|--------------------|---------|
|                                             | $\beta$ (95%CI)   | p-value | $\beta$ (95%CI)    | p-value | $\beta$ (95%CI)    | p-value |
| Sex                                         |                   |         |                    |         |                    |         |
| Boys vs. girls (reference)                  | /                 | /       | -3.42(-6.49,-0.34) | 0.03    | -4.22(-7.43,1.02)  | 0.01    |
| Age                                         | /                 | /       | 4.44(3.23,5.65)    | p<0.001 | 4.06(2.83,5.30)    | p<0.001 |
| Pubertal status                             |                   |         |                    |         |                    |         |
| Pre-pubertal vs. pubertal (reference)       | /                 | /       | -4.26(-8.17,-0.34) | 0.03    | -4.59(-8.45,-0.72) | 0.02    |
| Family socioeconomic status                 |                   |         |                    |         |                    |         |
| Low vs. high (reference)                    | /                 | /       | -5.08(-12.04,1.88) | 0.15    | -3.02(-9.93,3.89)  | 0.39    |
| Medium vs. high (reference)                 | /                 | /       | -3.86(-7.30,-0.42) | 0.03    | -3.16(-6.60,0.27)  | 0.07    |
| Daylight duration                           | /                 | /       | 1.03(0.45,1.62)    | 0.001   | 1.00(0.42,1.57)    | 0.001   |
| BMI z-scores                                | /                 | /       | 4.14(2.63,5.65)    | p<0.001 | 4.39(2.88,5.90)    | p<0.001 |
| Baseline bone stiffness index percentiles   |                   |         | 0.45(0.39,0.51)    | p<0.001 | 0.43(0.37,0.50)    | p<0.001 |
| Average screen time                         | /                 | /       | /                  | /       | 0.02(-0.22,0.26)   | 0.88    |
| Average sports club                         | /                 | /       | /                  | /       | 1.89(1.14,2.63)    | p<0.001 |
| Baseline nocturnal sleep duration z-scores  | -1.84(-4.10,0.43) | 0.11    | -0.57(-2.46,1.32)  | 0.55    | -0.43(-2.30,1.44)  | 0.65    |
| Baseline daytime napping                    | -2.51(-3.71,1.32) | p<0.001 | -1.20(-2.20,-0.19) | 0.02    | -1.06(-2.05,-0.07) | 0.04    |
| Follow-up nocturnal sleep duration z-scores | -0.40(-2.37,1.57) | 0.69    | -0.63(-2.27,1.02)  | 0.46    | -0.73(-2.35,0.89)  | 0.38    |
| Follow-up daytime napping                   | 1.24(0.41,2.08)   | 0.004   | 0.78(0.07,1.48)    | 0.03    | 0.84(0.14,1.53)    | 0.02    |
| Sleep quality <sup>b</sup>                  |                   |         |                    |         |                    |         |
| Poor vs. good (reference)                   | 2.92(-1.45,7.29)  | 0.19    | -1.28(-5.02,2.46)  | 0.50    | -1.29(-4.98,2.40)  | 0.49    |

Footnote: Model 1: unadjusted model only with a random effect for country

Model 2: Model 1 + adjusted for bone stiffness index percentiles at baseline, sex, age, family socioeconomic status, pubertal status, BMI z-scores and daylight duration at follow-up

Model 3: Model 2 + adjusted for average screen time and time spent at sports club at both surveys

**Table S4** Interaction terms of meeting sleep guidelines and sleep quality with screen time and sports club on bone stiffness index percentiles

|                                                           | Cross-sectional models |         | Longitudinal models |         |
|-----------------------------------------------------------|------------------------|---------|---------------------|---------|
|                                                           | $\beta$ (95%CI)        | p-value | $\beta$ (95%CI)     | p-value |
| Baseline total sleep duration <sup>a</sup> * screen time  | 0.03(-0.20,0.27)       | 0.78    | -0.52(-1.02,-0.03)  | 0.04    |
| Baseline total sleep duration <sup>a</sup> * sports club  | 0.70(-0.21,1.61)       | 0.13    | 0.48(-1.45,2.41)    | 0.63    |
| Baseline sleep quality <sup>b</sup> * screen time         | -0.03(-0.22,0.17)      | 0.78    | 0.22(-0.18,0.62)    | 0.28    |
| Baseline sleep quality <sup>b</sup> * sports club         | -0.64(-1.33,0.05)      | 0.07    | 1.02(-0.40,2.44)    | 0.16    |
| Follow-up total sleep duration <sup>a</sup> * screen time | /                      | /       | -0.31(-0.76,0.13)   | 0.17    |
| Follow-up total sleep duration <sup>a</sup> * sports club | /                      | /       | -0.38(-2.01,1.26)   | 0.65    |
| Follow-up sleep quality <sup>b</sup> * screen time        | /                      | /       | 0.13(-0.29,0.54)    | 0.55    |
| Follow-up sleep quality <sup>b</sup> * sports club        | /                      | /       | -0.38(-1.85,1.08)   | 0.61    |

Footnote: All cross-sectional models were adjusted for sex, age, family socioeconomic status, screen time, time spent at sports club, BMI z-scores and daylight duration, with a random effect for country

All longitudinal models were adjusted for bone stiffness index percentiles at baseline, sex, age, family socioeconomic status, pubertal status, BMI z-scores and daylight duration at follow-up as well as average screen time and time spent at sports club at both surveys

<sup>a</sup> Based on the sleep recommendation from the National Sleep Foundation, adequate sleep duration as reference

<sup>b</sup> Good sleep quality as reference
